# Supplementary material for: A global analysis of the dry-dynamic forcing during cyclone growth and propagation
Source: Copernicus journal article supplement (doi:10.5194/wcd-2021-17), 2021-03-29
Supplement: Supplementary file 1 [file wcd-2021-17-supplement.pdf]

**Supplement to**

**A global analysis of the dry-dynamic forcing during cyclone growth and propagation**

Philippe Besson<sup>1</sup>, Luise J. Fischer<sup>1,2</sup>, Sebastian Schemm<sup>1</sup>, and Michael Sprenger<sup>1</sup>

<sup>1</sup>Atmospheric and Climate Science, ETH Zürich, Switzerland

<sup>2</sup>Institute for Environmental Decisions, ETH Zürich, Switzerland

**Correspondence:** michael.sprenger@env.ethz.ch

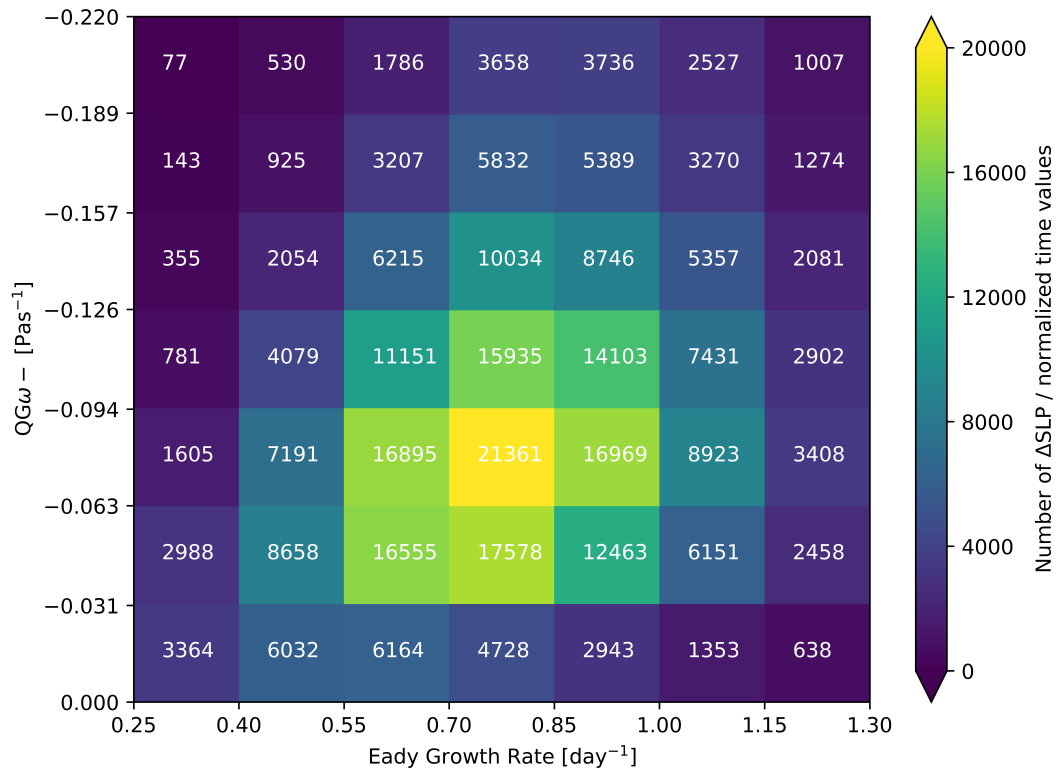

**Figure S1.** Number of six-hour time segments attributed to each bin in the 2D forcing diagram. The color shading corresponds to the exact values given in the bins. Note that only the growth phase (genesis to maturity) during the cyclones' life cycle is taken into account.

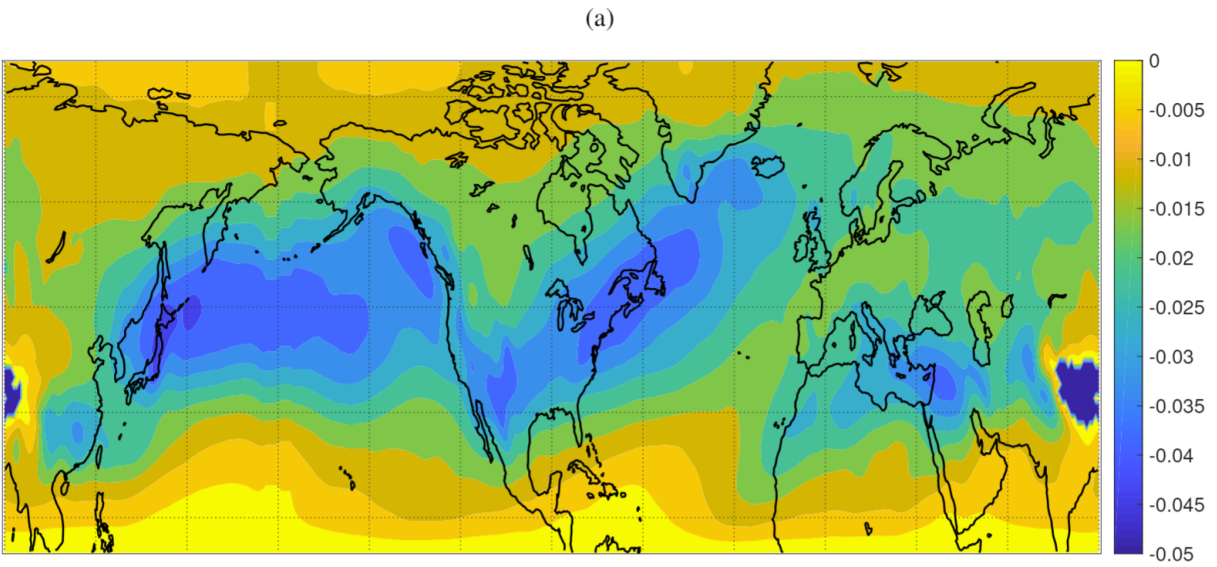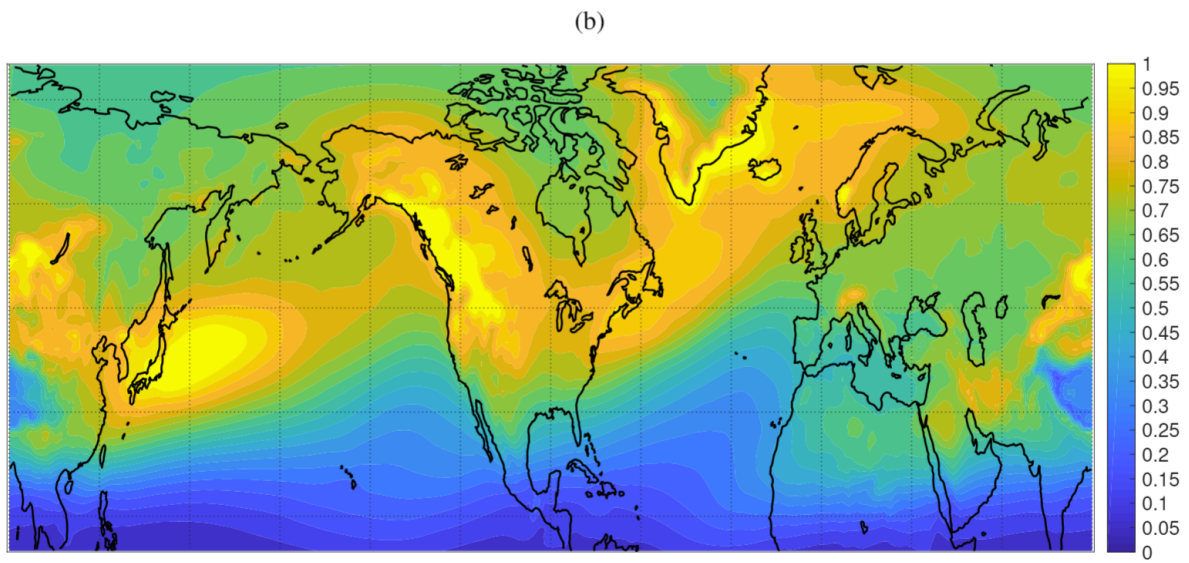

**Figure S2.** Winter month (Oct-Mar) climatology of (a)  $QG\omega$  (in  $\text{Pa s}^{-1}$ ) and (b) EGR ( $\text{day}^{-1}$ ) based on ERA-Interim (1979-2016).
